# Supplementary material
Source: publisher site journal article supplement (https://www.dovepress.com/article/452227)
Supplement: Supplementary file 1 [file get_supplementary_file.php]

**Supplementary Table 1** Exposures source and description

| Phenotype       | Sample size | GWAS ID          |
|-----------------|-------------|------------------|
| <b>bNGF</b>     | 3531        | ebi-a-GCST004421 |
| <b>CTACK</b>    | 3631        | ebi-a-GCST004420 |
| <b>Eotaxin</b>  | 8153        | ebi-a-GCST004460 |
| <b>FGFBasic</b> | 7565        | ebi-a-GCST004459 |
| <b>GCSF</b>     | 7904        | ebi-a-GCST004458 |
| <b>GROa</b>     | 3505        | ebi-a-GCST004457 |
| <b>HGF</b>      | 8292        | ebi-a-GCST004449 |
| <b>IFNg</b>     | 7701        | ebi-a-GCST004456 |
| <b>IL-10</b>    | 7681        | ebi-a-GCST004444 |
| <b>IL-12p70</b> | 8270        | ebi-a-GCST004439 |
| <b>IL-13</b>    | 3557        | ebi-a-GCST004443 |
| <b>IL-16</b>    | 3483        | ebi-a-GCST004430 |
| <b>IL-17</b>    | 7760        | ebi-a-GCST004442 |
| <b>IL-18</b>    | 3636        | ebi-a-GCST004441 |
| <b>IL-1b</b>    | 3309        | ebi-a-GCST004448 |
| <b>IL1ra</b>    | 3638        | ebi-a-GCST004447 |
| <b>IL-2</b>     | 3475        | ebi-a-GCST004455 |
| <b>IL2ra</b>    | 3677        | ebi-a-GCST004454 |
| <b>IL-4</b>     | 8124        | ebi-a-GCST004453 |
| <b>IL-5</b>     | 3364        | ebi-a-GCST004452 |
| <b>IL-6</b>     | 8189        | ebi-a-GCST004446 |
| <b>IL-7</b>     | 3409        | ebi-a-GCST004451 |
| <b>IL-8</b>     | 3526        | ebi-a-GCST004445 |
| <b>IL-9</b>     | 3634        | ebi-a-GCST004450 |
| <b>IP10</b>     | 3685        | ebi-a-GCST004440 |
| <b>MCP1</b>     | 8293        | ebi-a-GCST004438 |
| <b>MCP3</b>     | 843         | ebi-a-GCST004437 |
| <b>MCSF</b>     | 840         | ebi-a-GCST004436 |
| <b>MIF</b>      | 3494        | ebi-a-GCST004423 |
| <b>MIG</b>      | 3685        | ebi-a-GCST004435 |
| <b>MIP1a</b>    | 3522        | ebi-a-GCST004434 |
| <b>MIP1b</b>    | 8243        | ebi-a-GCST004433 |
| <b>PDGFbb</b>   | 8293        | ebi-a-GCST004432 |
| <b>RANTES</b>   | 3421        | ebi-a-GCST004431 |
| <b>SCF</b>      | 8290        | ebi-a-GCST004429 |
| <b>SCGFb</b>    | 3682        | ebi-a-GCST004428 |
| <b>SDF1a</b>    | 5998        | ebi-a-GCST004427 |
| <b>TNFa</b>     | 3454        | ebi-a-GCST004426 |
| <b>TNFb</b>     | 1559        | ebi-a-GCST004425 |
| <b>TRAIL</b>    | 8186        | ebi-a-GCST004424 |
| <b>VEGF</b>     | 7118        | ebi-a-GCST004422 |

ALM, appendicular lean mass; Hand grip strength, HGS;EWGSOP, European Working Group on Sarcopenia in Older People.

BDNF, brain-derived neurotrophic factor;

bNGF, beta-nerve growth factor;

CNTF, ciliary neurotrophic factor;

CTACK, cutaneous T-cell attracting chemokine;

FGFBasic, fibroblast growth factor basic;

GCSF, granulocyte colony-stimulating factor;

GROa, growth-regulated-alpha;

HGF, hepatocyte growth factor;

IFN $\beta$ , interferon-beta;

IFN $\gamma$ , interferon-gamma;

IGF1, insulin-like growth factor 1;

IL, interleukin;

IP10, interferon gamma-induced protein 10;

LIF, leukemia inhibitory factor;

MCP1, monocyte chemoattractant protein-1;

MCP3, monocyte-specific chemokine 3;

MCSF1, Macrophage colony-stimulating factor 1;

MIF, macrophage migration inhibitory factor;

MIG, monokine induced by interferon gamma;

MIP1a, macrophage inflammatory protein-1a;

MIP1b, macrophage inflammatory protein-1b;

PDGFB, platelet-derived growth factor subunit A

PDGFB, platelet-derived growth factor subunit B

PDGFbb, platelet-derived growth factor BB;

RANTES, regulated upon activation normal T cell expressed and presumably secreted;

SCF, stem cell factor;

SCGFb, stem cell growth factor beta;

SDF1, stromal cell-derived factor-1

TNF $\alpha$ , tumor necrosis factor alpha;

TNF $\beta$ , tumor necrosis factor beta;

TRAIL, TNF-related apoptosis inducing ligand;

VEGF, vascular endothelial growth factor;

VEGFD, vascular endothelial growth factor D

**Supplementary Table 2** MR analysis of association between inflammatory factors and risk of diabetic nephropathy.

| Phenotype       | nSNPs | MR-PRESSO |           |       |         | IVW  |           |          |        |         |
|-----------------|-------|-----------|-----------|-------|---------|------|-----------|----------|--------|---------|
|                 |       | OR        | 95%CI     | p_val | P_p_val | OR   | 95%CI     | p_val    | Q      | Q_p_val |
| <b>bNGF</b>     | 7     | 0.92      | 0.75-1.12 | 0.457 | 0.17    | 0.92 | 0.78-1.08 | 0.315    | 9.595  | 0.142   |
| <b>CTACK</b>    | 9     | 1.07      | 0.94-1.21 | 0.297 | 0.351   | 1.07 | 0.95-1.20 | 0.227    | 9.386  | 0.311   |
| <b>Eotaxin</b>  | 16    | 1.04      | 0.91-1.19 | 0.545 | 0.278   | 1.04 | 0.92-1.18 | 0.488    | 8.828  | 0.221   |
| <b>FGFBasic</b> | 5     | 1.13      | 0.84-1.50 | 0.451 | 0.438   | 1.13 | 0.85-1.49 | 0.389    | 4.246  | 0.373   |
| <b>GCSF</b>     | 8     | 1.03      | 0.85-1.25 | 0.718 | 0.548   | 1.03 | 0.84-1.27 | 0.725    | 6.110  | 0.526   |
| <b>GROa</b>     | 10    | 1.02      | 0.96-1.08 | 0.514 | 0.836   | 1.02 | 0.94-1.10 | 0.613    | 5.011  | 0.833   |
| <b>HGF</b>      | 7     | 0.94      | 0.76-1.16 | 0.608 | 0.489   | 0.94 | 0.76-1.17 | 0.607    | 5.433  | 0.489   |
| <b>IFNg</b>     | 9     | 1.33      | 1.18-1.51 | 0.002 | 0.944   | 1.33 | 1.09-1.63 | 5.00E-03 | 2.952  | 0.937   |
| <b>IL-10</b>    | 10    | 0.89      | 0.76-1.04 | 0.188 | 0.295   | 0.89 | 0.78-1.02 | 0.101    | 11.922 | 0.217   |
| <b>IL-12p70</b> | 10    | 0.94      | 0.85-1.05 | 0.332 | 0.69    | 0.94 | 0.84-1.05 | 0.34     | 7.825  | 0.551   |
| <b>IL-13</b>    | 9     | 0.96      | 0.89-1.05 | 0.443 | 0.749   | 0.96 | 0.88-1.06 | 0.501    | 5.578  | 0.694   |
| <b>IL-16</b>    | 10    | 0.89      | 0.80-1.01 | 0.104 | 0.3     | 0.89 | 0.81-0.99 | 0.043    | 11.222 | 0.26    |
| <b>IL-17</b>    | 10    | 1.04      | 0.89-1.21 | 0.611 | 0.689   | 1.04 | 0.87-1.23 | 0.642    | 6.967  | 0.64    |
| <b>IL-18</b>    | 15    | 0.96      | 0.89-1.03 | 0.281 | 0.884   | 0.96 | 0.88-1.05 | 0.395    | 8.028  | 0.887   |
| <b>IL-1b</b>    | 5     | 0.86      | 0.69-1.06 | 0.245 | 0.544   | 0.86 | 0.69-1.06 | 0.172    | 4.032  | 0.401   |
| <b>IL1ra</b>    | 6     | 0.88      | 0.75-1.03 | 0.182 | 0.56    | 0.88 | 0.73-1.05 | 0.171    | 3.909  | 0.562   |
| <b>IL-2</b>     | 9     | 1.07      | 0.91-1.26 | 0.401 | 0.319   | 1.07 | 0.93-1.24 | 0.302    | 17.733 | 0.023   |
| <b>IL2ra</b>    | 6     | 1.03      | 0.94-1.13 | 0.491 | 0.736   | 1.03 | 0.91-1.16 | 0.583    | 2.721  | 0.742   |
| <b>IL-4</b>     | 9     | 0.96      | 0.77-1.20 | 0.772 | 0.33    | 0.96 | 0.78-1.18 | 0.747    | 9.253  | 0.321   |
| <b>IL-5</b>     | 5     | 0.95      | 0.80-1.13 | 0.636 | 0.495   | 0.95 | 0.80-1.13 | 0.609    | 4.003  | 0.405   |
| <b>IL-6</b>     | 5     | 0.98      | 0.82-1.18 | 0.906 | 0.776   | 0.98 | 0.75-1.28 | 0.932    | 1.861  | 0.761   |
| <b>IL-7</b>     | 9     | 1.01      | 0.89-1.13 | 0.892 | 0.357   | 1.01 | 0.90-1.11 | 0.877    | 9.691  | 0.287   |
| <b>IL-8</b>     | 4     | 1.02      | 0.91-1.15 | 0.645 | 0.834   | 1.02 | 0.82-1.27 | 0.791    | 0.816  | 0.845   |
| <b>IL-9</b>     | 6     | 0.98      | 0.83-1.17 | 0.901 | 0.508   | 0.98 | 0.82-1.18 | 0.901    | 4.491  | 0.481   |
| <b>IP10</b>     | 10    | 0.93      | 0.86-0.86 | 0.157 | 0.948   | 0.93 | 0.82-1.06 | 0.334    | 3.529  | 0.529   |
| <b>MCP1</b>     | 14    | 1.07      | 0.96-1.19 | 0.208 | 0.83    | 1.07 | 0.94-1.22 | 0.281    | 8.651  | 0.798   |
| <b>MCP3</b>     | 3     | NA        | NA        | NA    | NA      | 1.08 | 0.94-1.25 | 0.241    | 3.396  | 3.396   |
| <b>MCSF</b>     | 8     | 0.99      | 0.83-1.18 | 0.961 | 0.188   | 0.96 | 0.86-1.07 | 0.515    | 17.347 | 0.015   |
| <b>MIF</b>      | 6     | 1.07      | 1.00-1.13 | 0.051 | 0.995   | 1.07 | 0.90-1.26 | 0.397    | 0.547  | 0.991   |
| <b>MIG</b>      | 13    | 0.98      | 0.87-1.10 | 0.796 | 0.42    | 0.98 | 0.87-1.10 | 0.787    | 32.349 | 0.002   |
| <b>MIP1a</b>    | 7     | 1.07      | 0.95-1.20 | 0.278 | 0.83    | 1.07 | 0.91-1.26 | 0.401    | 2.986  | 0.81    |
| <b>MIP1b</b>    | 17    | 0.92      | 0.86-0.98 | 0.026 | 0.699   | 0.92 | 0.85-0.98 | 0.022    | 13.859 | 0.609   |
| <b>PDGFbb</b>   | 11    | 0.94      | 0.83-1.06 | 0.104 | 0.652   | 0.94 | 0.82-1.07 | 0.382    | 25.622 | 0.012   |
| <b>RANTES</b>   | 9     | 0.99      | 0.85-1.16 | 0.973 | 0.287   | 0.99 | 0.86-1.14 | 0.969    | 9.835  | 0.276   |
| <b>SCF</b>      | 9     | 1.25      | 1.12-1.39 | 0.004 | 0.966   | 1.25 | 1.02-1.52 | 2.70E-02 | 2.539  | 0.959   |
| <b>SCGFb</b>    | 14    | 1.02      | 0.92-1.14 | 0.607 | 0.204   | 1.02 | 0.93-1.13 | 0.542    | 17.381 | 0.182   |
| <b>SDF1a</b>    | 9     | 1.26      | 0.96-1.64 | 0.127 | 0.249   | 1.26 | 0.99-1.59 | 0.051    | 10.501 | 0.231   |

|              |    |      |           |       |       |      |           |       |        |       |
|--------------|----|------|-----------|-------|-------|------|-----------|-------|--------|-------|
| <b>TNFa</b>  | 3  | NA   | NA        | NA    | NA    | 1.05 | 0.82-1.36 | 0.649 | 12.54  | 0.013 |
| <b>TNFb</b>  | 4  | 1.02 | 0.86-1.21 | 0.785 | 0.262 | 1.02 | 0.90-1.15 | 0.677 | 5.868  | 0.118 |
| <b>TRAIL</b> | 15 | 0.98 | 0.88-1.09 | 0.771 | 0.123 | 0.98 | 0.90-1.07 | 0.719 | 20.559 | 0.113 |
| <b>VEGF</b>  | 10 | 0.98 | 0.91-1.07 | 0.809 | 0.544 | 0.98 | 0.90-1.08 | 0.818 | 7.716  | 0.562 |

P\_p\_val : MR-PRESSO global test; Q\_p\_val: Cochran's Q-test.
